# Supplementary material for: The component formula of Salvia miltiorrhiza and Panax ginseng induces apoptosis and inhibits cell invasion and migration through targeting PTEN in lung cancer cells
Source: PubMed Central journal article supplement (PMC5731899; doi:10.18632/oncotarget.21354), 2017-09-28
Supplement: oncotarget-08-101599-s001.pdf [file oncotarget-08-101599-s001.pdf]

# The component formula of *Salvia miltiorrhiza* and *Panax Ginseng* induces apoptosis and inhibits cell invasion and migration through targeting PTEN in lung cancer cells

## SUPPLEMENTARY MATERIALS

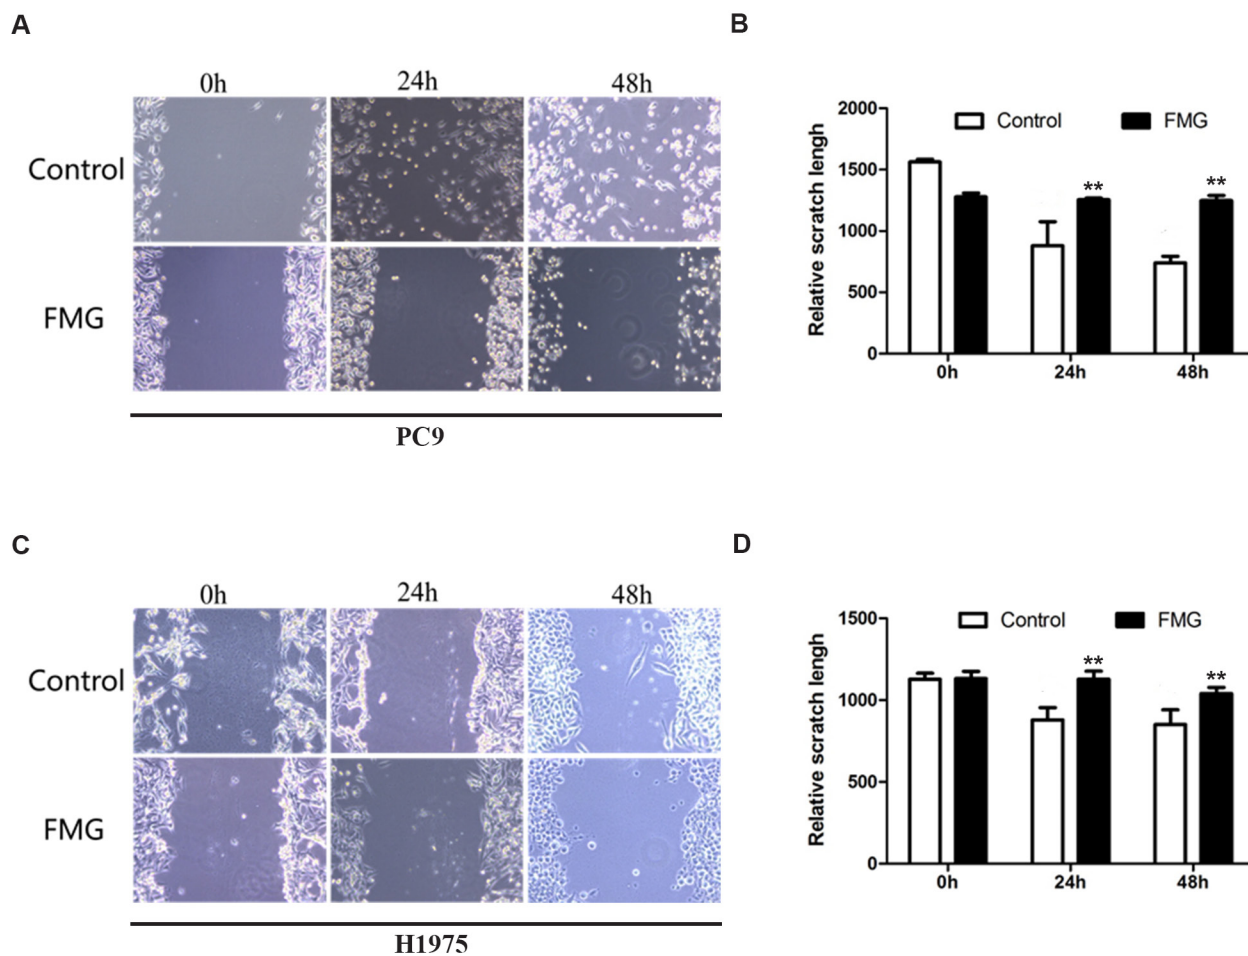

**Supplementary Figure 1: The effects of FMG on cell migration in lung cancer cells.** (A) Wound healing assays were used to assess the migration ability of PC9 cells after scratches. Cells were exposed to FMG for 24 and 48 h respectively, and then visualized by inverted phase contrast microscope. (B) Quantification of the relative scratch length in PC9 cells calculated by Image J software. (C) Wound healing assays were used to assess the migration ability of H1975 cells after scratches. Cells were exposed to FMG for 24 and 48 h respectively, and then visualized by inverted phase contrast microscope. (D) Quantification of the relative scratch length in H1975 cells calculated by Image J software.

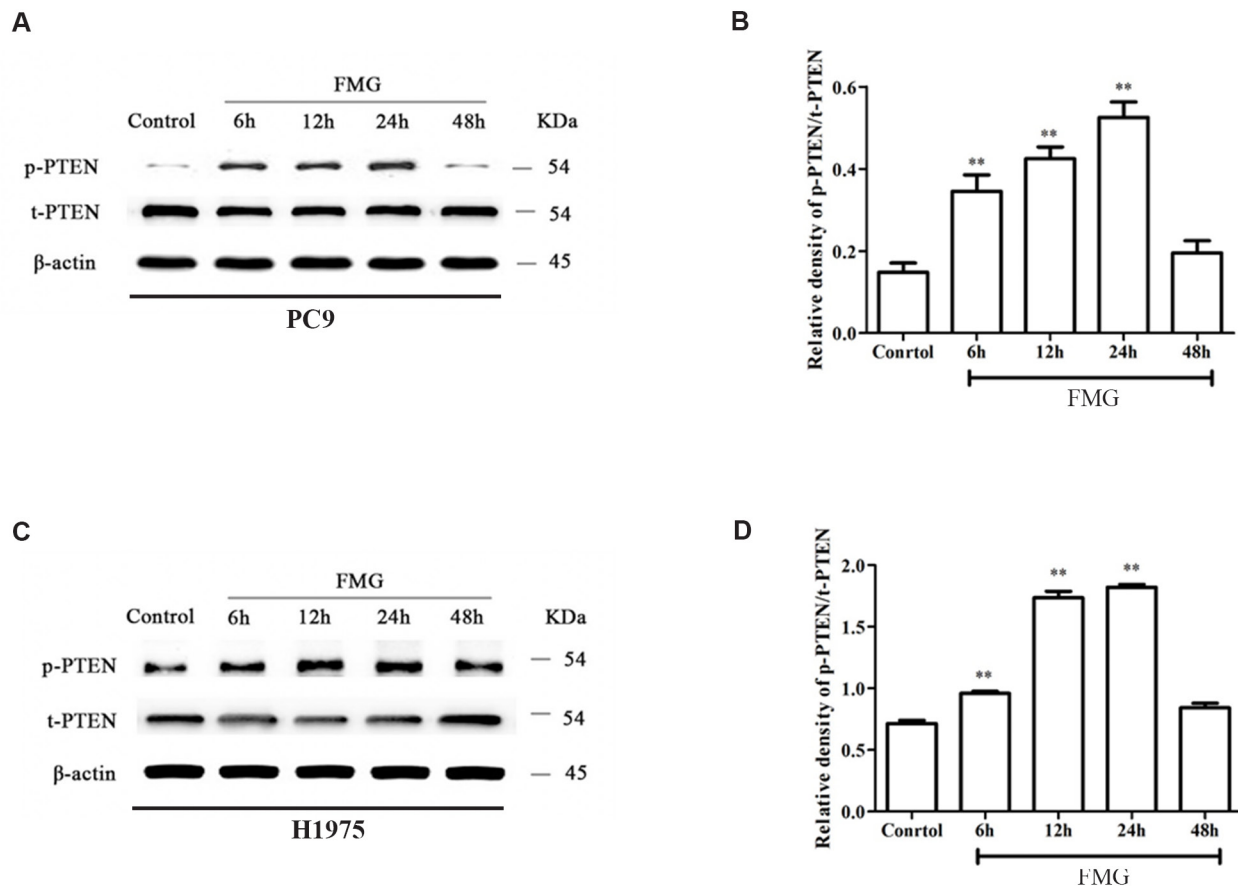

**Supplementary Figure 2: The effects of FMG on the phosphorylation of PTEN in lung cancer cells.** (A) PC9 cells were incubated with FMG for 6, 12, 24 and 48 h, respectively and then the p-PTEN, t-PTEN and β-actin were assessed via western blotting. (B) Quantification of p-PTEN/t-PTEN ratio folds of β-actin was calculated by Image J software in PC9 cells. Values expressed as mean ± SD from three independent experiments, \**P* < 0.05, \*\**P* < 0.01 vs. control group. (C) H1975 cells were incubated with FMG for 6, 12, 24 and 48 h, respectively and then the p-PTEN, t-PTEN and β-actin were assessed via western blotting. (D) Quantification of p-PTEN/t-PTEN ratio folds of β-actin was calculated by Image J software in H1975 cells. Values expressed as mean ± SD from three independent experiments, \**P* < 0.05, \*\**P* < 0.01 vs. control group.

**Supplementary Table 1 : Optimizing the most effective component formula of Salviae Miltiorrhizae Radix et Rhizoma and Ginseng Radix et Rhizoma on cell proliferation of BEAS-2B and A549 cell line using the orthogonal design method ( $\bar{x}\pm s$ , n=3)**

| Groups  | BEAS-2B       |               | A549          |               |
|---------|---------------|---------------|---------------|---------------|
|         | A (OD)        | IR (%)        | A (OD)        | IR (%)        |
| Control | 0.917±0.199   |               | 1.012±0.098   |               |
| 1       | 0.193±0.003** | 78.991±0.345  | 0.169±0.003** | 83.335±0.286  |
| 2       | 0.181±0.000** | 80.314±0.039  | 0.191±0.036** | 81.096±3.525  |
| 3       | 0.805±0.007** | 12.197±0.781  | 0.677±0.118*  | 33.156±11.612 |
| 4       | 0.185±0.002   | 79.816±0.167  | 0.167±0.002** | 83.533 ±0.228 |
| 5       | 0.980±0.117   | -6.889±12.789 | 0.847±0.015*  | 16.352±1.485  |
| 6       | 0.210±0.003** | 77.086±0.359  | 0.165±0.003** | 83.671±0.314  |
| 7       | 0.608±0.083   | 33.697±9.025  | 0.165±0.002** | 83.740±0.181  |
| 8       | 0.194±0.007** | 78.805±0.792  | 0.162±0.002** | 83.970 ±0.227 |
| 9       | 0.184±0.005** | 79.929±0.524  | 0.166±0.001** | 83.582±0.120  |

Note: \* $P < 0.05$ , \*\* $P < 0.01$  vs. control group.

Supplementary Table 2: Univariate analysis of data generated from the L9 (3)4 orthogonal array

|          | Value |            | 95% Confidence Interval |             |
|----------|-------|------------|-------------------------|-------------|
|          | Mean  | Std. Error | Lower bound             | Upper Bound |
| A(Sal A) |       |            |                         |             |
| 1        | 0.782 | 0.087      | 0.598                   | 0.966       |
| 2        | 0.500 | 0.087      | 0.361                   | 0.683       |
| 3        | 0.766 | 0.087      | 0.582                   | 0.950       |
| B(Rh2)   |       |            |                         |             |
| 1        | 0.769 | 0.087      | 0.585                   | 0.952       |
| 2        | 0.517 | 0.087      | 0.333                   | 0.701       |
| 3        | 0.761 | 0.087      | 0.577                   | 0.945       |
| C(Rg3)   |       |            |                         |             |
| 1        | 0.936 | 0.087      | 0.752                   | 1.120       |
| 2        | 0.968 | 0.087      | 0.784                   | 1.152       |
| 3        | 0.143 | 0.087      | -0.041                  | 0.327       |
| D(GPS)   |       |            |                         |             |
| 1        | 0.509 | 0.087      | 0.325                   | 0.926       |
| 2        | 0.772 | 0.087      | 0.588                   | 0.956       |
| 3        | 0.767 | 0.087      | 0.583                   | 0.950       |

Note: 1(10 µg/mL); 2(5 µg/mL); 3(0 µg/mL)

Sal A: Salvianolic acid A

Rh2: Ginsenoside Rh2

Rg3: Ginsenoside Rg3

GPS: Ginseng polysaccharide

Supplementary Table 3: Variance analysis of data generated from the L9 (3)4 orthogonal array

| Source          | Type III of Squares | df | Mean Square | F       | p-value |
|-----------------|---------------------|----|-------------|---------|---------|
| Corrected Model | 5.155 <sup>a</sup>  | 8  | 0.644       | 9.355   | <0.0001 |
| Intercept       | 12.570              | 1  | 12.570      | 182.478 | <0.0001 |
| A (Sal A)       | 0.452               | 2  | 0.226       | 3.283   | 0.061   |
| B (Rh2)         | 0.368               | 2  | 0.184       | 2.671   | 0.096   |
| C (Rg3)         | 3.928               | 2  | 1.964       | 28.509  | 0.000   |
| D (GPS)         | 0.407               | 2  | 0.204       | 2.957   | 0.078   |
| Error           | 1.240               | 18 | 0.069       |         |         |
| Total           | 18.965              | 27 |             |         |         |
| Corrected Total | 6.395               | 26 |             |         |         |

Note: <sup>a</sup> R Squared=0.996 (Adjusted R Squared=0.880)

Sal A: Salvianolic acid A

Rh2: Ginsenoside Rh2

Rg3: Ginsenoside Rg3

GPS: Ginseng polysaccharide

Supplementary Table 4: The effects of FMG on cell proliferation in both BEAS-2B and lung cancer cells using MTT assay

| Time | Group   | OD      | IR(%)         |               |               |
|------|---------|---------|---------------|---------------|---------------|
| 12h  | BEAS-2B | Control | 0.863±0.063   | 17.474±2.652  |               |
|      |         | FMG     | 0.712±0.229   |               |               |
|      | H1975   | Control | 0.596±0.067   | 52.782±5.898  |               |
|      |         | FMG     | 0.282±0.035** |               |               |
|      | A549    | Control | 1.660±0.215   | 57.017±5.718  |               |
|      |         | FMG     | 0.714±0.095** |               |               |
|      | PC9     | Control | 0.771±0.140   | 43.561±2.336  |               |
|      |         | FMG     | 0.435±0.018** |               |               |
|      | 24h     | BEAS-2B | Control       | 1.424±0.334   | 14.058±16.602 |
|      |         |         | FMG           | 1.224±0.236   |               |
|      |         | H1975   | Control       | 1.714±0.305   | 72.009±3.010  |
|      |         |         | FMG           | 0.480±0.052** |               |
| A549 |         | Control | 1.600±0.071   | 54.530±8.440  |               |
|      |         | FMG     | 0.728±0.135** |               |               |
| PC9  |         | Control | 1.937±0.520   | 32.370±4.529  |               |
|      |         | FMG     | 1.310±0.088** |               |               |
| 48h  |         | BEAS-2B | Control       | 0.890±0.169   | 31.328±16.502 |
|      |         |         | FMG           | 0.147±0.012   |               |
|      |         | H1975   | Control       | 1.728±.0314   | 73.418±3.442  |
|      |         |         | FMG           | 0.459±0.059** |               |
|      | A549    | Control | 1.609±0.206   | 50.596±14.396 |               |
|      |         | FMG     | 0.795±0.232** |               |               |
|      | PC9     | Control | 2.027±0.338   | 40.186±5.472  |               |
|      |         | FMG     | 1.212±0.111** |               |               |

**Supplementary Table 5: The affinity value of FMG and PTEN protein**

| No. | Group | Conc.(nM)            | Response | Kon (1/Ms)           | Kdis (1/s)            | KD (M)                | Full X <sup>2</sup> | Full R <sup>2</sup> |
|-----|-------|----------------------|----------|----------------------|-----------------------|-----------------------|---------------------|---------------------|
| 1   | FMG   | 1.62×10 <sup>5</sup> | 0.3537   | 9.70×10 <sup>3</sup> | 3.14×10 <sup>-1</sup> | 3.24×10 <sup>-5</sup> | 11.133              | 0.906               |
| 2   |       | 8.09×10 <sup>4</sup> | 0.2761   |                      |                       |                       |                     |                     |
| 3   |       | 4.04×10 <sup>4</sup> | 0.1691   |                      |                       |                       |                     |                     |
| 4   |       | 2.02×10 <sup>4</sup> | 0.106    |                      |                       |                       |                     |                     |
| 5   |       | 1.01×10 <sup>4</sup> | 0.08     |                      |                       |                       |                     |                     |

**Supplementary Table 6: Orthogonal design factors and levels of L9(3)<sup>4</sup>**

| Levels | Factors   |                      |                      |         |
|--------|-----------|----------------------|----------------------|---------|
|        | A (Sal A) | B (Rh <sub>2</sub> ) | C (Rg <sub>3</sub> ) | D (GPS) |
| 1      | 1         | 1                    | 1                    | 1       |
| 2      | 2         | 2                    | 2                    | 2       |
| 3      | 3         | 3                    | 3                    | 3       |

Note: 1(10 µg/mL); 2(5 µg/mL); 3(0 µg/mL)

Sal A: Salvianolic acid A

Rh<sub>2</sub>: Ginsenoside Rh<sub>2</sub>

Rg<sub>3</sub>: Ginsenoside Rg<sub>3</sub>

GPS: Ginseng polysaccharide

Supplementary Table 7: The orthogonal design table of L9 (3)<sup>4</sup>

| Group | A (Sal A) | B (Rh2) | C (Rg3) | D (GPS) |
|-------|-----------|---------|---------|---------|
| 1     | 1         | 1       | 1       | 1       |
| 2     | 1         | 2       | 2       | 2       |
| 3     | 1         | 3       | 3       | 3       |
| 4     | 2         | 1       | 2       | 3       |
| 5     | 2         | 2       | 3       | 1       |
| 6     | 2         | 3       | 1       | 2       |
| 7     | 3         | 1       | 3       | 2       |
| 8     | 3         | 2       | 1       | 3       |
| 9     | 3         | 3       | 2       | 1       |

Note: 1(10 µg/mL); 2(5 µg/mL); 3(0 µg/mL)

Sal A: Salvianolic acid A

Rh2: Ginsenoside Rh2

Rg3: Ginsenoside Rg3

GPS: Ginseng polysaccharide

Supplementary Table 8: Bacterial strains and plasmids

| Strains and plasmids | Phenotypes                                                                             |
|----------------------|----------------------------------------------------------------------------------------|
| <i>E. coli</i> DH5α  | F,φ80d/lacZ <sub>Δ</sub> M15,deoR,recA1,endA,hsdR17, phoA,supE44,λ-,thi-1,gyrA96,relA1 |
| <i>E. coli</i> BL21  | F- <i>dcm ompT hsdS</i> (rB-mB-) <i>gal</i>                                            |
| pET28a <sup>+</sup>  | His-fusion expression vector, Kn <sup>r</sup>                                          |
